# Supplementary material for: Screening and Prostate-Cancer Mortality in a Randomized European Study
Source: Atypon-hosted journal article supplement (doi:10.1056/nejmoa0810084), 2009-03-18
Supplement: nejm_schroder_1320sa1.pdf [file nejm_schroder_1320sa1.pdf]

## Supplementary Appendix

This appendix has been provided by the authors to give readers additional information about their work.

Supplement to: Schröder FH, Hugosson J, Roobol MJ, et al. Screening and prostate-cancer mortality in a randomized European study. *N Engl J Med* 2009;360:1320-8. DOI: 10.1056/NEJMoa0810084.

## **Appendix 1: Acknowledgements.**

The following people are being acknowledged for their contribution to the ERSPC study.

### **The Netherlands:**

Erasmus Medical Centre, Departments of Urology, Clinical Chemistry, Pathology, Public Health and statistics Netherlands (CBS)

Dr. W.J. Kirkels, urologist.  
Dr. J.B.W Rietbergen, urologist.  
Dr. I.W. van der Cruijssen, urologist  
Drs. R. Raaijmakers, urologist  
Drs. S.H. de Vries, urologist  
Dr. S.Roemeling, urologist  
Dr. C.Gosselaar, general practitioner  
Drs. T.Wolters, PhD student  
Drs. R.C.N. van den Bergh, PhD student  
Drs. P.J. van Leeuwen, PhD student  
Drs. G. Yurdakul, urologist  
Drs. A. Boeken-Kruger, urologist  
Drs. C. Wijburg, urologist  
Drs. M. Forouzanfor, urologist  
Drs. M. De Boer, urologist  
Dr. R. Postma, pathologist  
Dr. A.N. Vis, urologist  
Dr. R. Hoedemaeker, pathologist  
Dr. A. Van Leenders, pathologist  
Dr. R. van Schaik, clinical chemistry  
Prof. Dr. P.J. van der Maas, epidemiologist  
Dr. S. Otto, epidemiologist  
Dr. G. Draisma, statistician  
Dr. P. Beemsterboer, epidemiologist  
Dr. M. Essink-Bot, epidemiologist  
Dr. I. Korfage, epidemiologist  
Dr. R. Boer, informatician/mathematician  
Dr. M. Wildhagen, statistician  
Dr. E. Heijnsdijk, epidemiologist  
Drs. W. Merkelbach, COD committee  
Dr. W. Hoekstra, COD committee  
Dr. J. Blom, COD committee  
Drs. RAM Damhuis, epidemiologist, cancer registry  
Drs. A. Reedijk, epidemiologist, cancer registry

Dr. R. Kranse, statistician, cancer registry  
Mrs. D.W. Roobol, data management  
Mr. W. Roobol, web site management  
Mrs. E. van den Berg, administrative support  
Mr. G-J de Zwart, echografist  
Mrs. C.G.A.M. Franken-Raab, data management  
Mrs. M. van Slooten-Midderig, data management  
Mrs. A. Smit, medical assistant  
Mrs. V van der Drift, data management  
Mrs. E. de Bilde, data management  
Mrs. L. Mani, medical assistant  
Mrs. M. Visser-van Dongen, data management  
Mrs. H. Versteeg-Leenheer, data management  
Mrs. B. Zoutendijk, data management  
Mrs. N. Vink, data management  
Mrs. H. van Meurs, echografist  
Mrs. A E. de Bruijn, secretary

**Belgium:**

H. Devriendt Dr.Sc, director, Provinciale Institute Hygiene  
G. Thijs, Data Manager, Provinciale Institute Hygiene  
A. Hermans, Data Manager, Provinciale Institute Hygiene  
K. D'Hooge, Data Manager, Provinciale Institute Hygiene  
Dr. H. Neels, lab Biochemistry, ZNA Antwerp City Hospitals  
Dr. A. Wauters, lab Biochemistry, ZNA Antwerp City Hospitals  
Dr. I. Neetens, lab Pathology, ZNA Antwerp City Hospitals  
Dr. M. Kockx, lab pathology, ZNA Antwerp City Hospitals  
Prof. F. Keuppens, University Hospital Brussels Urology  
Dr. J. Braeckman, University Hospital Brussels Urology  
Dr. F. Govaerts, General Practice Associations, WVVH, UHAK, DOMUS, HAVAC  
Dr. B. Spinnewijn, General Practice Associations, WVVH, UHAK, DOMUS, HAVAC  
Dr. M. Van Hoey, General Practice Associations, WVVH, UHAK, DOMUS, HAVAC  
Dr. T. Putzeys, General Practice Associations, WVVH, UHAK, DOMUS, HAVAC

M. De Coninck, chair, Oncologic Centre Antwerp  
B. Dourcy-Belle-Rose, Coordinator, Oncologic Centre Antwerp  
A. Vancauwenbergh, Secretary, Oncologic Centre Antwerp  
Prof. J.W. Coebergh, COD committee  
Prof. H. Verhaegen, COD committee  
Dr. Van Vliet, COD committee  
Dr. B. Standaert

Mr. L. Van Herck

**Sweden:**

Maria Nyberg, study nurse  
Svante Bergdahl, Urologist  
Pär Lodding, Urologist  
Ali Khatami, Urologist, former PhD-student  
Johan Stranne, Urologist  
Helén Ahlgren, data manager, study secretary  
Gun-Britt Eriksson, Laboratory technician  
Charlotte Becker, MD, PhD, Clinical chemistry  
Sigrid Carlsson, PhD-student  
Anna Grenabo, PhD-student  
Silas Pettersson, COD committee  
Eberhard Varenhorst, COD committee  
Bo-Johan Norlén, COD committee  
Björn Zackrisson, Urologist, former PhD-student  
Erik Holmberg, Statistician and database manager  
Roland Frösing, Urologist  
Erik Pileblad, Urologist  
Carl-Gustaf Pihl, pathologist, pathology committee

**Finland:**

Paula Kujala, pathologist, pathology committee, Dept. of Pathology, Centre for Laboratory Medicine, Tampere University Hospital, Tampere, Finland  
Marita Laurila, pathologist, pathology committee, Dept. of Pathology, Centre for Laboratory Medicine, Tampere University Hospital, Tampere, Finland  
Ulf-Håkan Stenman, Dept. of Clinical Chemistry, Helsinki University Hospital, Helsinki  
Patrik Finne, Dept. of Clinical Chemistry, Helsinki University Hospital, Helsinki  
Mirja Ruutu, Dept. of Urology, Helsinki University Central Hospital, Helsinki  
Martti Ala-Opas, Dept. of Urology, Helsinki University Central Hospital, Helsinki  
Jussi Aro, Dept. of Urology, Helsinki University Central Hospital, Helsinki  
Harri Juusela, Helsinki University Central Hospital, Jorvi Hospital, Espoo  
Markus Mildh, Helsinki University Central Hospital, Peijas-Rekola Hospital, Vantaa  
Matti Hakama, School of Public Health, Tampere and Finnish Cancer Registry, Helsinki  
Jorma Lahtela, Dept. of Internal Medicine, Tampere University Hospital, Tampere  
Pekka J Karhunen, Dept. of Forensic Medicine and Research Unit of Clinical Chemistry, University of Tampere, Tampere  
Tuukka Mäkinen, Dept. of Urology, Tampere University Hospital, Tampere  
Tapio Visakorpi, Laboratory of Cancer Genetics, Institute of Medical Technology, University of Tampere, Tampere  
Jorma Isola, Laboratory of Cancer Genetics, Institute of Medical Technology, University of Tampere, Tampere

**Italy:**

Mario Cappellini, COD Committee  
Simonetta Bianchi, COD Committee  
Claudio Lombardi, COD Committee  
Alessandro Bussotti, COD Committee  
Paolo Bastiani, COD Committee  
Co-operators:  
Rita Bonardi  
Antonia Mazzotta  
Dusca Bartoli  
Liana Bonfrisco  
Emanuele Crocetti  
Francesca Martinelli  
Paola Zendron  
Paola Frullini  
Simonetta Di Lollo, Pathology committee  
Tiziana Rubeca

**Spain:**

Alvaro Páez, urologist, Hospital de Fuenlabrada. Madrid, Spain.  
Carlos Pascual, Hospital Universitario de Getafe. Madrid, Spain.  
Carlos Santonja, pathologist, Pathology committee, Hospital Universitario de Getafe. Madrid, Spain.

**Switzerland:**

Kantonsspital Aarau AG, Aarau, Switzerland

Prof. Dr. Andreas Huber, quality of PSA screening test, Centre of Laboratory Medicine.  
Prof. Dr. Reto Tscholl, Chairman of CODC, Professor emeritus, Department of Urology,  
Prof. Dr. Bernhard Stamm, Pathologist, histopathological evaluation and pathological review, Institute for Pathology,  
Dr. med. Martin Wernli, Oncologist, care for patients, Department of Oncology and Hematology  
PD Dr. Michael Kurrer, Pathologist, Member of local CoDC, Institute for Pathology  
Prof. Dr. Stephan Bodis, Radiooncologist, care for patients, Department of Radiooncology  
Mr. Thomas Lautenschlager, Study manager, Department of Urology.

University Hospital Basel, Basel, Institute for Pathology, Division of Cytology.  
Prof. Dr. Lukas Bubendorf, Review Pathologist, Pathology Committee.

Kantonsspital Baden AG, Baden, Department of Urology,  
Dr. med. Kurt Lehmann, Urologist.

Aargau Association of Medical Doctors, Baden.  
Dr. med. Giorgio Bugliani, General practitioner, cooperation with general practitioners in Aargau

Department of Medicine, University Hospital Zürich, Zürich.  
Prof. Dr. Johann Steurer, Internist, Member of local COD committee.

COD committee = Causes of Death committee.

### **The United Kingdom.**

Datamanagers of the ERSPC central database:

J.Hemming  
P.Coulson.  
D.Coleman.

## **Appendix 2: Grants received per centre.**

### **The Netherlands:**

The Dutch Cancer Society (KWF 94-869, 98-1657, 2002-277, 2006-3518); The Netherlands Organisation for Health Research and Development (ZonMW-002822820, 22000106, 50-50110-98-311).

### **Belgium:**

Europe against Cancer, Flemish Ministry of Welfare, Public Health and Family, Province and City of Antwerp, Public Centre for Social Welfare Antwerp

### **Sweden:**

Abbott Pharmaceuticals, Sweden, Af Jochnick's foundation, Catarina and Sven Hagstroms family foundation, Gunvor and Ivan Svensson's foundation, Johanniterorden, King Gustav V Jubilee Clinic Cancer Research Foundation, Sahlgrenska University Hospital, Schering Plough, Sweden, Swedish Cancer Society, Wallac Oy, Turku, Finland.

### **Finland:**

The Academy of Finland, The Cancer Society of Finland, The Finnish Cancer Institute, The Medical Research Fund of Tampere University Hospital, The Competitive Research Funding of the Pirkanmaa Hospital District, The Sigrid Juselius Foundation, The Pirkanmaa Cancer Society, The Finnish Cultural Foundation, The Helsinki University Central Hospital Research Funds, The Foundation of K. Albin Johansson, The Finska Läkaresällskapet, The Medical Research Fund of Seinäjoki Central Hospital, The Stockman Foundation, The Helsingin Sanomat Centenarian Foundation, The Europe Against Cancer Program, Perkin Elmer-Wallac, Doctoral Programme in Public Health, AstraZeneca Group and Pharmacia Corporation in support of a PhD thesis

### **Italy:**

Italian League for the Fight against Cancer - LILT Lega Italiana per la Lotta contro i Tumori

Italian Association for Cancer Research - AIRC Associazione Italiana Ricerca sul Cancro

National Research Council - CNR Consiglio Nazionale delle Ricerche

Tuscany Region - Regione Toscana

### **Spain:**

The Spanish "Fondo de Investigación Sanitaria": 96/0248, 99/0245, 02/0732, 06/0831.

### **Switzerland:**

The Horten Foundation, Aargau Cancer League, Swiss Cancer League (Grant Nr KFS 787-2-1999 and 01112-02-2001), Health Department of Canton Aargau, Prostate Cancer Research Foundation and Baugarten Foundation.

### **International coordination:**

European Union Grants SOC 95 35109, SOC 96 201869 05F022, SOC 97 201329, SOC 98 32241, the 6th Framework Program of the EU: PMark:LSHC-CT-2004-503011;

### **Unconditional grants:**

Beckman-Coulter-Hybritech Inc.

## Appendix 3: Pathology review

### The Pathology Committee of ERSPC.

#### Composition and mandate:

The Pathology Committee of the ERSPC is composed of the reference pathologists representing one of each ERSPC screening center (see below for list of members). Their mandate is to enhance the application of the guidelines on reporting of prostate biopsies of participants of the screening arm of the ERSPC trial (see documentation 1, below).

#### Objectives of the Pathology Committee:

- 1) To guard the uniformity in tissue processing and nomenclature of diagnosis and staging terms in the histopathological reporting of sextant needle biopsies taken from participants of the screening arm of the ERSPC trial.
- 2) To enhance the quality of histopathological diagnosis of prostate biopsies.
- 3) To reduce the inter-observer variation among screening centers particularly with regard to Gleason score of prostatic adenocarcinomas .

#### **Duties of the members of the Pathology Committee**

- 1) Supervision of the pathology reporting of the prostate biopsies obtained from participants in the ERSPC screening centers.

In most centers the reference pathologists reviewed all needle biopsies of patients with a diagnosis of adenocarcinoma or a lesion suspicious for carcinoma. They further provide low threshold (intradepartmental) inter-collegial consultations for prostate biopsy diagnostics. In a few centers the reference pathologists examines and reports all prostate biopsies of the participants of the screening arm of the ERSPC trial.

- 2) Attendance of the annual Pathology Committee used for discussion of issues regarding quality assurance, uniform reporting and Gleason scoring.
- 3) Participation in slide reviews and educational sessions, designed for reduction of inter-observer variation of Gleason score and diagnosis.

#### Actions to reduce inter-observer variation for Gleason score on prostate biopsies:

- 1) Educational sessions using multihedder microscope.
- 2) Inter-observer studies using virtual microscopy (see Helin H, Lundin M, Lundin J, Martikainen P, Tammela T, Helin H, Van der Kwast TH. Web-based virtual microscopy in teaching and standardizing Gleason grading. Hum Pathol. 2005; 36: 381-386).
- 3) On site review of prostate biopsies of the Finnish ERSPC trial by two members of the pathology committee (Van der Kwast, Hoedemaeker) in order to improve grading consistency (see document 2 for details).

#### Documents / publications produced by the Pathology Committee of the ERSPC:

1. Guidelines document accepted at the Consensus Workshop on Prostatic Screening held in Antwerp (see Denis L, Murphy GP, Schröder FH. Cancer 1995; 75: 1178-1207): van der Kwast TH, Lopes C, Santonja C, Pihl C-G, Martikainen P, Di Lollo S, Bubendorf L, Hoedemaeker RF, and members of the pathology committee of the ERSPC. Guidelines for processing and reporting of prostatic needle biopsies. J. Clin Path 2003; 56:336-40.
2. Van der Kwast TH, Roobol MJ, Wildhagen MF, Martikainen PM, Määttä L, Pihl C-G, Santonja C, Bubendorf L, Neetens I, Di Lollo S and Hoedemaeker RF. Consistency of prostate cancer grading results in screened populations across Europe. BJUI 2003; 92 (S2): 88-91.
3. Van der Kwast TH, Lopes C, Martikainen PM, Pihl CG, Santonja C, Neetens I, Di Lollo S, Hoedemaeker RF. Report of the Pathology Committee: false-positive and false-negative diagnoses of prostate cancer. BJU Int. 2003 Dec;92 Suppl 2:62-5.

4. Van der Kwast TH, Ciatto S, Martikainen PM, Hoedemaeker R, Laurila M, Pihl C-G, Hugosson J, Neetens I, Nelen V, Di Lollo S, Roobol MJ, Maattanen L, Santonja C, Moss S and Schröder FH. Detection rates of high-grade prostate cancer during subsequent screening visits. Results of the European Randomized Screening Study for Prostate Cancer. Int J Cancer 2006; 118: 2538-2542

Members of the Pathology Committee

|                   |                                     |
|-------------------|-------------------------------------|
| Th. Van der Kwast | ERSPC section Rotterdam (chair)     |
| G.J. van Leenders | ERSPC section Rotterdam (2004-)     |
| R.F. Hoedemaeker  | ERSPC section Rotterdam (1997-2002) |
| C-G. Pihl         | ERSPC section Goteborg              |
| P.M. Martikainen  | ERSPC section Tampere/Helsinki      |
| M. Laurila        | ERSPC section Tampere/Helsinki      |
| L. Bubendorf      | ERSPC section Aarau                 |
| C. Santonja       | ERSPC section Getafe ( -2007)       |
| I. Neetens        | ERSPC section Antwerp               |
| S. DiLollo        | ERSPC section Florence              |
| C. Mazerolles     | ERSPC section Toulouse              |
| C. Lopes          | ERSPC section Oporto                |

#### **Appendix 4: Medical ethical approvals per centre.**

##### **The Netherlands:**

| Institution                       | Date of issue        | Record number |
|-----------------------------------|----------------------|---------------|
| Health Council of The Netherlands | March 29,<br>1996    | 1996/02       |
| Health Council of The Netherlands | December<br>15, 2000 | 2000/05       |
| Health Council of The Netherlands | July 24, 2007        | 2007/03       |

##### **Belgium:**

| Institution                                                                               | Date of issue | Record number         |
|-------------------------------------------------------------------------------------------|---------------|-----------------------|
| Ministry of the Flemish Community, the minister of welfare,<br>national health and family | 1999          | ZG/PET/ERSPC<br>06031 |
| Ministry of the Flemish Community, the minister of welfare,<br>national health and family | 2002          | ZG/PET/ERSPC<br>06031 |
| Ministry of the Flemish Community, the minister of welfare,<br>national health and family | 2004          | ZG/PET/ERSPC<br>06031 |

##### **Sweden:**

| Institution            | Date of issue | Record number |
|------------------------|---------------|---------------|
| University of Göteborg | 02-02-1994    | 463-93        |
| University of Göteborg | 31-05-1995    | 180-95        |

##### **Finland:**

| Institution                                                        | Date of issue | Record number |
|--------------------------------------------------------------------|---------------|---------------|
| Helsinki University Central Hospital (HUCH)                        | 21-2-1994     |               |
| City of Espoo, Jorvi Hospital                                      | 22-9-1995     | 4/1995        |
| Tampere University Hospital/Pirkanmaa Hospital District            | 30-4-1995     | 95077         |
| Population Register Centre                                         | 15-12-1995    | 1058/40/95    |
| National Research and Development Centre for Welfare and<br>Health | 15-11-1995    | 2054/54/95    |
| University of Helsinki, Faculty of Medicine                        | 12-3-1996     |               |
| City of Helsinki, Office for Health Care                           | 4-6-1996      | 6/96          |
| City of Vantaa                                                     | 2-2-1996      | 6/96          |
| Ministry of Social Affairs and Health in Finland                   | 1-10-1999     | 51/07/1999    |
| City of Tampere                                                    | 13-12-2000    | 7649/403/2000 |
| Hospital District of Helsinki and Uusimaa                          | 29-1-2001     | 55/2000       |

The National Authority for Medico legal Affairs  
Statistcs Finland

27-2-2002 601/32/300/02  
19-12-2003 tk-53-1610-03

**Italy:**

| Institution                                                    | Date of issue | Record number |
|----------------------------------------------------------------|---------------|---------------|
| The Centro per lo Studio e la Prevenzione Oncologica , Firenze | 03-06-1996    | 1996/06/03    |

**Spain:**

| Institution                      | Date of issue | Record number |
|----------------------------------|---------------|---------------|
| Hospital Universitario de Getafe | 22-03-2006    | Acta -3/06    |

**Switzerland:**

| Institution         | Date of issue | Record number |
|---------------------|---------------|---------------|
| Kantonsspital Aarau | 09-09-1998    | 1998-09-09/rk |

**Appendix 5:**Table 1A: Randomization, participants and results of screening per center (all ages)

|                                                                             | <b>Netherlands</b>               | <b>Belgium</b>                 | <b>Sweden</b>      | <b>Finland</b>                | <b>Italy</b>                   | <b>Spain</b>                    | <b>Switzerland</b>             | <b>Total</b>   |
|-----------------------------------------------------------------------------|----------------------------------|--------------------------------|--------------------|-------------------------------|--------------------------------|---------------------------------|--------------------------------|----------------|
| <b>Period of randomization</b>                                              | <b>Nov 1993 –<br/>March 2000</b> | <b>June 1991-<br/>Dec 2003</b> | <b>31 Dec 1994</b> | <b>Jan 1996-<br/>Jan 1999</b> | <b>Oct 1996 –<br/>Oct 2000</b> | <b>Feb 1996 –<br/>June 1999</b> | <b>Sep 1998 -<br/>Aug 2003</b> |                |
| <b>Randomized – N</b>                                                       | 43,368                           | 10,359                         | 19,911             | 80,379                        | 14,972                         | 3702                            | 10,309                         | 182,000        |
| - screening                                                                 | 21,206 (50.1%)                   | 5,188 (50.1%)                  | 9,957 (50.0%)      | 31,970 (39.8%)                | 7,497 (50.1%)                  | 1840 (49.7%)                    | 5,158 (50.0%)                  | 82,816 (45.5%) |
| - control                                                                   | 21,162 (49.9%)                   | 5,171 (49.9%)                  | 9,954 (50.0%)      | 48,409 (60.2%)                | 7,475 (49.9%)                  | 1,862 (50.3%)                   | 5,151 (50.0%)                  | 99,184 (54.5%) |
| <b>Age at randomization (aver. /<br/>median)</b>                            | 63,6 / 63,2                      | 64,3 / 64,1                    | 56,8 / 56,4        | 59,6 / 58,7                   | 62,4 / 62,0                    | 57,5 / 56,6                     | 61,6 / 61,0                    | 61,4 / 61,2    |
| - age screen population                                                     | 63.6 / 63.2                      | 64.3 / 64.0                    | 56.8 / 56.3        | 59.6 / 58.7                   | 62.4 / 61.9                    | 57.1 / 56.1                     | 61.5 / 60.9                    | 61.5 / 61.3    |
| - age control population                                                    | 63.7 / 63.2                      | 64.4 / 64.2                    | 56.8 / 56.4        | 59.6 / 58.7                   | 62.4 / 62.1                    | 57.9 / 57.1                     | 61.7 / 61.2                    | 61.3 / 61.1    |
| <b>Screened, 1<sup>st</sup> screen N (% of<br/>randomized to screening)</b> | 19,970 (94.2)                    | 4567 (88.0)                    | 5,855 (58.8)       | 20,796 (65.1)                 | 5,106 (68.1)                   | 1840 (100)                      | 4,923 (95.4)                   | 63,057 (76.1)  |
| <b>Screen interval (years)</b>                                              | 4                                | 4-7                            | 2                  | 4                             | 4                              | 4                               | 4                              | ---            |
| Screened at least once - N                                                  | 19,970                           | 4,649                          | 7,510              | 23,608                        | 5,841                          | 1840                            | 4,942                          | 68,360         |
| Screen tests done – N                                                       | 38,586                           | 6,847                          | 26,709             | 48,900                        | 11,646                         | 3317                            | 9319                           | 145,324        |
| Positive tests – N (%)                                                      | 9,064 (23.4)                     | 1,136 (16.6)                   | 4,154 (15.6)       | 5,528 (11.3)                  | 1,308 (11.4)                   | 543 (16.4)                      | 1,915 (20.5)                   | 23,648(16.3)   |
| Biopsies – N (%)                                                            | 8,085 (89.2)                     | 825 (72.6)                     | 3,626 (87.4)       | 4,991 (90.3)                  | 849 (64.9)                     | 394 (72.7)                      | 1,467 (76.6)                   | 20,237 (85.6)  |
| <b>Prostate cancers</b>                                                     |                                  |                                |                    |                               |                                |                                 |                                |                |
| Screening arm total – N                                                     | 2,153                            | 437                            | 997                | 2,493                         | 296                            | 87                              | 367                            | 6,830          |
| Screen detected N                                                           | 26.6                             | 208                            | 805                | 1,477                         | 185                            | 78                              | 277                            | 4,860          |
| Interval and Non attender N                                                 | 323                              | 229                            | 192                | 1,016                         | 111                            | 9                               | 90                             | 1,970          |
| PPV (S det cancers/biopsy, %)                                               | 22.6                             | 25.2                           | 22.2               | 29.6                          | 20.1                           | 19.8                            | 18.9                           | 23.9           |
| Det. rate (total cancers / all rand.<br>To S arm, %)                        | 10.2                             | 8.4                            | 10.0               | 7.8                           | 3.9                            | 4.7                             | 7.3                            | 8.3            |
| <b>Prostate cancers</b>                                                     |                                  |                                |                    |                               |                                |                                 |                                |                |
| Control arm – N                                                             | 901                              | 332                            | 577                | 2,632                         | 138                            | 33                              | 168                            | 4,781 (4.8)    |

\* Interval PC are cases that were clinically detected during the screening interval, Non attender PC are clinically detected cases in men who refused screening

**Appendix 6:** Distribution of Clinical T-stages and biopsy Gleason scores at diagnosis per study arm.

( ) = M1 or PSA > 100 where no bone scan was performed

Core age group, all centers combined.

**Table A: Presentation of the raw data, unadjusted for missing information. M1 = positive bonescan or PSA > 100 where no bone scan was performed**

| T-Stage           | Screening arm<br>N=5.990 |       | Control arm<br>N=4.307 |       |
|-------------------|--------------------------|-------|------------------------|-------|
|                   |                          | M1    |                        | M1    |
| <u>T1/T1A/T1B</u> | 190                      | ( 1)  | 207                    | ( 4)  |
| <u>T1c</u>        | 3.086                    | ( 25) | 1.346                  | ( 19) |
| <u>T2</u>         | 1.571                    | ( 32) | 984                    | ( 55) |
| <u>T3</u>         | 456                      | ( 59) | 559                    | (138) |
| <u>T4</u>         | 60                       | ( 32) | 117                    | ( 79) |
| <u>missing</u>    | 627                      | ( 5)  | 1.094                  | ( 9)  |
| <u>Total</u>      | 5.990                    | (149) | 4.307                  | (304) |

M1 disease 0.39 per 1000 person years in C-arm versus 0.23 per 1000 person years in I arm, a 41% reduction ( P < 0.0001)

| Gleason score | Screening arm<br>N=5.990 | Not yet in the<br>data base | Control arm<br>N=4.307 | Not yet in the<br>data base |
|---------------|--------------------------|-----------------------------|------------------------|-----------------------------|
| <b>2-6</b>    | 3.520                    |                             | 1.518                  |                             |
| <b>7</b>      | 990                      |                             | 799                    |                             |
| <b>&gt; 7</b> | 363                      |                             | 455                    |                             |
| <b>Total</b>  | 4.873                    | 1.126                       | 2.772                  | 1.538                       |

**Table B: Adjusted for missing information by extrapolation from data given in table A, assuming similar stage distribution in missing cases**

| <b>T-Stage</b>    | <b>Screening arm<br/>N=5.990</b> | <b>Control arm<br/>N=4.307</b> |
|-------------------|----------------------------------|--------------------------------|
| <u>T1/T1A/T1B</u> | 212                              | 277                            |
| <u>T1c</u>        | 3.447                            | 1.805                          |
| <u>T2</u>         | 1.755                            | 1.320                          |
| <u>T3</u>         | 509                              | 749                            |
| <u>T4</u>         | 67                               | 156                            |
|                   |                                  |                                |
| <u>Total</u>      | 5.990                            | 4.307                          |

T3+T4 cases: 1.15 per 1000 person years in C-arm versus 0.90 per 1000 person years in I arm, a 22% reduction ( P < 0.0001)

**Appendix 7: Distribution of primary treatments per study arm.**

| <b>Treatment</b>                | <b>Total group<br/>N=10.309<br/>N/ (%)</b> | <b>Screening arm<br/>N=5.990<br/>N/(%)</b> | <b>Control arm<br/>N=4.307<br/>N/(%)</b> |
|---------------------------------|--------------------------------------------|--------------------------------------------|------------------------------------------|
| Surgery alone                   | 2.911 (28.3)                               | 2.020 (33.7)                               | 891 (20.7)                               |
| Radiotherapy alone              | 1.727 (16.8)                               | 1.198 (20.0)                               | 529 (12.3)                               |
| Surgery & Radiotherapy          | 28 (0.3)                                   | 13 (0.2)                                   | 15 (0.3)                                 |
| Hormone therapy alone           | 1.061 (10.3)                               | 409 (6.8)                                  | 652 (15.1)                               |
| Surgery & hormone therapy       | 109 (1.1)                                  | 69 (1.2)                                   | 40 (0.9)                                 |
| Hormone & Radiotherapy          | 976 (9.5)                                  | 405 (6.8)                                  | 571 (13.2)                               |
| Surgery, Hormone & Radiotherapy | 4 (0.04)                                   | 3 (0.05)                                   | 1 (0.02)                                 |
| Surgery & Gene therapy          | 2 (0.02)                                   | 1 (0.02)                                   | 1 (0.02)                                 |
| Watchful Waiting                | 1.553 (15.1)                               | 1.116 (18.6)                               | 437 (10.1)                               |
| W Waiting/Surgery               | 13 (0.1)                                   | 7 (0.1)                                    | 6 (0.14)                                 |
| W Waiting/Radiotherapy          | 1 (0.01)                                   | 1 (0.02)                                   | -                                        |
| W Waiting/Hormone Therapy       | 4 (0.04)                                   | 2 (0.03)                                   | 2 (0.05)                                 |
| Not Known                       | 1.908 (18.5)                               | 746 (12.5)                                 | 1.162 (26.9)                             |
|                                 |                                            |                                            |                                          |
| <b>Total</b>                    | <b>10.297 (100.0)</b>                      | <b>5.990 (100.0)</b>                       | <b>4.307 (100.0)</b>                     |

**Appendix 8: Deaths within 30 days after prostate cancer diagnosis per study arm.**

| <b>Arm</b>       | <b>PC Cases (N)</b> | <b>Deaths (N,%)</b> |
|------------------|---------------------|---------------------|
| <b>Screening</b> | 5.990               | 13 (0.22)           |
| <b>Control</b>   | 4.307               | 23 (0.53)           |
